# Supplementary material for: Attractive interactions between colloids at the oil–water interface
Source: Royal Society of Chemistry journal article supplement (doi:10.1039/c1sm00005e), 2011-01-01
Supplement: c1sm00005e.pdf [file c1sm00005e.pdf]

## Supplemental information: Attractive interactions between colloids at the oil-water interface

Bum Jun Park and Eric M. Furst<sup>a</sup>

*Department of Chemical Engineering and Center for Molecular and Engineering Thermodynamics,  
University of Delaware, Newark, Delaware 19716 USA*

### I. DOUBLET PARTICLE CHARACTERIZATION

Doublet particles are characterized using scanning electron microscopy (SEM). Figure ?? shows one such particle. The particles consist of two fused spheres with diameters  $3.9\mu\text{m}$  and a center-to-center separation of approximately  $2.2\mu\text{m}$ .

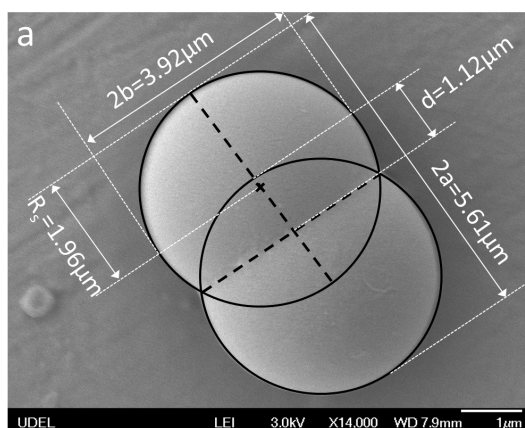

FIG. 1.  
SEM image of a doublet particle.

### II. INTERFACIAL TENSION AND THREE-PHASE CONTACT ANGLE

The interfacial tension of the oil-water interface  $\gamma_{OW}$  is measured using a pendant drop [1, 2] in the presence of a monovalent salt (NaCl) and an anionic surfactant (sodium dodecyl sulfate, SDS, Sigma Aldrich) in the aqueous phase, or a nonionic surfactant (sorbitan monooleate, SPAN80, Spectrum Chemicals) in the oil phase. The three-phase contact angle  $\theta_t$  formed by a small water drop placed on a thin polystyrene film in decane is measured using a goniometer. Although this leads to different absolute values of the contact angle compared to direct measurements [3], the measurements confirm that the contact angle increases with increasing surfactant concentration, as shown in figure 2.

<sup>a</sup> Email: [furst@udel.edu](mailto:furst@udel.edu), Tel: +1 302 831 0102, Fax: +1 302 831 1048, Web: [www.che.udel.edu/furst](http://www.che.udel.edu/furst)

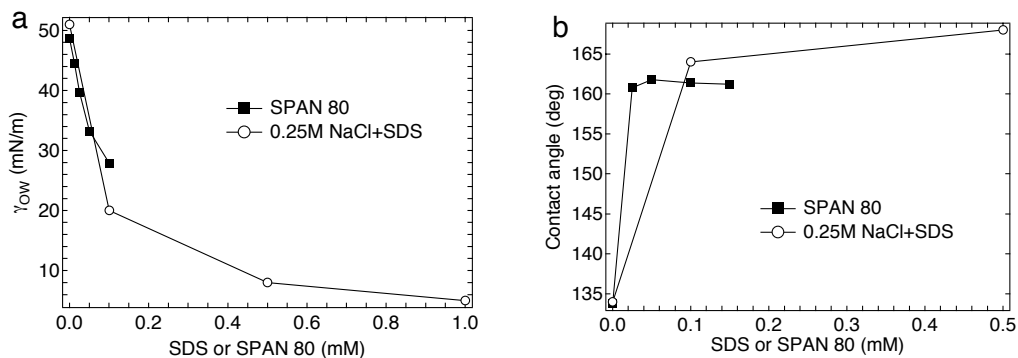

FIG. 2. Measurements of the (a) interfacial tension  $\gamma_{OW}$  and (b) three-phase contact angle  $\theta_t$ . Open circles are data for 0.25M NaCl and SDS in the aqueous sub-phase and closed squares are for SPAN 80 added to the decane super-phase.

- 
- [1] E. Stancik, G. Gavranovic, M. Widenbrant, A. Laschitsch, J. Vermant and G. Fuller, *Faraday Discuss*, 2003, **123**, 145–156.
  - [2] S. Reynaert, P. Moldenaers and J. Vermant, *Langmuir*, 2006, **22**, 4936–4945.
  - [3] R. Aveyard, J. Clint and D. Nees, *Colloid Polym Sci*, 2000, **278**, 155–163.
